# Supplementary material for: Bacteria associated with moon jellyfish during bloom and post-bloom periods in the Gulf of Trieste (northern Adriatic)
Source: PubMed Central journal article supplement (PMC6333360; doi:10.1371/journal.pone.0198056), 2019-01-15
Supplement: pone.0198056.s001.pdf [file pone.0198056.s001.pdf]

|                          |                                |                                     |       |      |      |       |       |       |       |       |      |
|--------------------------|--------------------------------|-------------------------------------|-------|------|------|-------|-------|-------|-------|-------|------|
|                          |                                | <i>Litoricolaceae</i>               |       |      |      |       |       |       |       | 2.53  | 2.63 |
|                          |                                | <i>SAR86</i>                        |       |      |      |       |       |       |       |       | 2.63 |
|                          |                                | <i>Moraxellaceae</i>                |       |      | 3.57 | 2.86  | 3.03  |       |       |       |      |
|                          |                                | <i>Pseudomonadaceae</i>             | 23.26 |      |      |       | 6.06  | 3.57  |       |       |      |
|                          |                                | <i>Piscirickettsiaceae</i>          |       |      |      |       |       |       |       |       | 1.32 |
|                          |                                | <i>Vibrionaceae</i>                 |       |      | 4.76 | 14.29 | 14.29 | 6.06  | 17.86 |       |      |
|                          |                                | <i>Xanthomonadaceae</i>             | 2.33  | 4.76 | 9.52 |       |       |       | 3.57  |       |      |
|                          |                                | Unclass. <i>Gammaproteobacteria</i> |       |      |      | 2.86  | 3.03  | 7.14  |       |       |      |
|                          | Unclass. <i>Proteobacteria</i> |                                     |       |      |      | 5.71  |       | 10.71 |       |       | 2.63 |
| <i>Verrucomicrobia</i>   | <i>Opitutae</i>                | <i>Puniceicoccaceae</i>             |       |      |      |       |       |       |       | 1.27  | 1.32 |
| Unclass. <i>Bacteria</i> |                                |                                     | 2.33  | 9.52 |      | 10.71 | 17.14 | 12.12 | 10.71 | 48.10 | 9.21 |
|                          |                                | Total                               | 100   | 100  | 100  | 100   | 100   | 100   | 100   | 100   | 100  |
|                          |                                | Chloroplast (%)                     |       |      |      |       |       |       |       | 12.22 | 2.56 |
