# Supplementary material for: Bacteria associated with moon jellyfish during bloom and post-bloom periods in the Gulf of Trieste (northern Adriatic)
Source: PubMed Central journal article supplement (PMC6333360; doi:10.1371/journal.pone.0198056), 2019-01-15
Supplement: pone.0198056.s002.pdf [file pone.0198056.s002.pdf]

**S2 Table. Bacterial isolates obtained from samples of jellyfish exumbrella (AK) and mucus from gastral cavity (AG) and seawater samples (W) at 5 m depth collected on May and June 2011 in the Gulf of Trieste.** Classification of bacterial isolates was done down to the genus level. The contribution of distinct bacterial taxa is expressed as a percentage of the total number of sequences in each sample. N is the total number of isolated bacteria.

| Class                    | Family                     | Genus                              | Sample<br>N | <i>Aurelia</i> Jellyfish |     |       |       |      |      |      |      |       |      | Seawater |       |
|--------------------------|----------------------------|------------------------------------|-------------|--------------------------|-----|-------|-------|------|------|------|------|-------|------|----------|-------|
|                          |                            |                                    |             | May                      |     |       |       |      | June |      |      |       |      | W_May    | W_Jun |
|                          |                            |                                    |             | AK1                      | AK3 | AK6   | AG1   | AG6  | AK8  | AK10 | AK11 | AG8   | AG11 |          |       |
|                          |                            |                                    |             | 10                       | 13  | 66    | 6     | 11   | 12   | 7    | 8    | 4     | 4    | 51       | 59    |
| <i>Actinobacteria</i>    | <i>Brevibacteriaceae</i>   | <i>Brevibacterium</i>              |             | –                        | –   | –     | –     | –    | –    | –    | –    | –     | –    | 1.96     | 23.73 |
|                          | <i>Microbacteriaceae</i>   | <i>Microbacterium</i>              |             | –                        | –   | 7.58  | –     | –    | –    | –    | –    | –     | –    | –        | –     |
|                          | <i>Micrococcaceae</i>      | <i>Arthrobacter</i>                |             | –                        | –   | –     | –     | –    | –    | –    | –    | –     | –    | –        | 1.69  |
|                          |                            | <i>Kocuria</i>                     |             | 20.00                    | –   | 3.03  | –     | –    | –    | –    | –    | –     | –    | –        | –     |
| <i>Flavobacteria</i>     | <i>Flavobacteriaceae</i>   | <i>Cellulophaga</i>                |             | –                        | –   | 1.52  | –     | –    | –    | –    | –    | –     | –    | –        | –     |
| <i>Sphingobacteria</i>   | <i>Sphingobacteriaceae</i> | <i>Sphingobacterium</i>            |             | –                        | –   | 10.61 | –     | –    | –    | –    | –    | –     | –    | –        | –     |
| <i>Bacilli</i>           | <i>Bacillaceae</i>         | <i>Bacillus</i>                    |             | –                        | –   | 1.52  | –     | 9.09 | –    | –    | –    | –     | –    | –        | 1.69  |
|                          |                            | <i>Terribacillus</i>               |             | –                        | –   | –     | –     | –    | –    | –    | –    | 25.00 | –    | –        | –     |
|                          | Family_XII_Incertae_Sedis  | <i>Exiguobacterium</i>             |             | –                        | –   | 4.55  | –     | –    | –    | –    | –    | –     | –    | –        | –     |
|                          | <i>Planococcaceae</i>      | <i>Planococcus</i>                 |             | –                        | –   | 1.52  | –     | –    | –    | –    | –    | –     | –    | –        | –     |
|                          | <i>Staphylococcaceae</i>   | <i>Salinicoccus</i>                |             | –                        | –   | 1.52  | –     | –    | –    | –    | –    | –     | –    | –        | –     |
|                          |                            | <i>Staphylococcus</i>              |             | –                        | –   | –     | –     | –    | –    | –    | –    | –     | –    | 3.92     | 1.69  |
| $\alpha$ -proteobacteria | <i>Caulobacteraceae</i>    | <i>Brevundimonas</i>               |             | –                        | –   | 13.64 | –     | 9.09 | –    | –    | –    | –     | –    | 3.92     | 11.86 |
|                          | <i>Hyphomonadaceae</i>     | <i>Maricaulis</i>                  |             | –                        | –   | –     | –     | –    | –    | –    | –    | –     | –    | 1.96     | –     |
|                          |                            | <i>Oceanicaulis</i>                |             | –                        | –   | –     | –     | –    | –    | –    | –    | –     | –    | –        | 1.69  |
|                          | <i>Aurantimonadaceae</i>   | <i>Aurantimonas</i>                |             | –                        | –   | –     | –     | –    | –    | –    | –    | –     | –    | 5.88     | –     |
|                          | <i>Hyphomicrobiaceae</i>   | <i>Devosia</i>                     |             | –                        | –   | –     | –     | –    | –    | –    | –    | –     | –    | –        | 1.69  |
|                          | <i>Phyllobacteriaceae</i>  | <i>Nitratireductor</i>             |             | –                        | –   | –     | –     | –    | –    | –    | –    | –     | –    | –        | 1.69  |
|                          |                            | Unclass. <i>Phyllobacteriaceae</i> |             | –                        | –   | –     | –     | –    | –    | –    | –    | –     | –    | 9.80     | 3.39  |
|                          | <i>Rhodobacteraceae</i>    | <i>Donghicola</i>                  |             | –                        | –   | –     | –     | –    | 8.33 | –    | –    | –     | –    | –        | –     |
|                          |                            | <i>Labrenzia</i>                   |             | 10.00                    | –   | –     | –     | –    | –    | –    | –    | –     | –    | –        | –     |
|                          |                            | <i>Paracoccus</i>                  |             | –                        | –   | 1.52  | –     | –    | –    | –    | –    | –     | –    | 5.88     | 3.39  |
|                          |                            | <i>Marivita</i>                    |             | –                        | –   | –     | –     | –    | –    | –    | –    | –     | –    | 7.84     | –     |
|                          |                            | <i>Phaeobacter</i>                 |             | 10.00                    | –   | –     | –     | –    | –    | –    | –    | –     | –    | –        | –     |
|                          |                            | Unclass. <i>Rhodobacteraceae</i>   |             | –                        | –   | –     | 16.67 | –    | –    | –    | –    | –     | –    | 5.88     | 3.39  |
|                          | <i>Erythrobacteraceae</i>  | <i>Erythrobacter</i>               |             | –                        | –   | –     | –     | –    | –    | –    | –    | –     | –    | 47.06    | 11.86 |
|                          |                            | <i>Porphyrobacter</i>              |             | –                        | –   | –     | –     | –    | –    | –    | –    | –     | –    | –        | 1.69  |
|                          |                            | Unclass. <i>Erythrobacteraceae</i> |             | –                        | –   | –     | –     | –    | –    | –    | –    | –     | –    | –        | –     |
|                          | <i>Sphingomonadaceae</i>   | <i>Sphingopyxis</i>                |             | –                        | –   | –     | 16.67 | –    | –    | –    | –    | –     | –    | –        | –     |
| $\beta$ -proteobacteria  | <i>Comamonadaceae</i>      | <i>Delftia</i>                     |             | 10.00                    | –   | 3.03  | –     | 9.09 | –    | –    | –    | –     | –    | –        | –     |
|                          |                            | Unclass. <i>Comamonadaceae</i>     |             | –                        | –   | –     | 16.67 | –    | –    | –    | –    | –     | –    | –        | –     |
| $\gamma$ -proteobacteria | <i>Alteromonadaceae</i>    | <i>Alteromonas</i>                 |             | –                        | –   | 1.52  | –     | –    | 8.33 | –    | –    | –     | –    | 3.92     | –     |
