# Supplementary material for: Bacteria associated with moon jellyfish during bloom and post-bloom periods in the Gulf of Trieste (northern Adriatic)
Source: PubMed Central journal article supplement (PMC6333360; doi:10.1371/journal.pone.0198056), 2019-01-15
Supplement: pone.0198056.s003.pdf [file pone.0198056.s003.pdf]

**S3 Table. Similarities percentage (SIMPER) analysis of 16S rRNA gene clone libraries from samples of jellyfish exumbrella (AK), oral arms (AR), and mucus from gastral cavity (AG) and seawater samples (W) collected on May and June 2011 in the Gulf of Trieste.**

**Group A\***

Average similarity: 47,60

| Species                       | Av.Abund | Av.Sim | Sim/SD | Contrib% | Cum.% |
|-------------------------------|----------|--------|--------|----------|-------|
| <i>Rhodobacteraceae</i>       | 9.29     | 31.83  | 1.33   | 66.86    | 66.86 |
| <i>Vibrionaceae</i>           | 2.43     | 4.99   | 0.71   | 10.48    | 77.35 |
| <i>Alteromonadaceae</i>       | 2        | 4.42   | 0.82   | 9.29     | 86.64 |
| <i>Pseudoalteromonadaceae</i> | 1.14     | 1.85   | 0.59   | 3.89     | 90.52 |

\* In group A are included all jellyfish samples

**Group W\***

Average similarity: 44,22

| Species                  | Av.Abund | Av.Sim | Sim/SD | Contrib% | Cum.% |
|--------------------------|----------|--------|--------|----------|-------|
| <i>Synechococcus</i>     | 6.33     | 11.44  | 7.23   | 25.88    | 25.88 |
| <i>Flavobacteriaceae</i> | 10       | 8.15   | 1.3    | 18.43    | 44.31 |
| <i>Litoricolaceae</i>    | 3.33     | 4.3    | 7.58   | 9.73     | 54.04 |
| SAR11                    | 5.33     | 4.07   | 1.3    | 9.21     | 63.25 |
| <i>Microbacteriaceae</i> | 2.33     | 2.84   | 2.48   | 6.42     | 69.67 |
| <i>Cryomorphaceae</i>    | 2        | 2.84   | 2.48   | 6.42     | 76.09 |
| <i>Rhodobacteraceae</i>  | 4.33     | 2.84   | 2.48   | 6.42     | 82.51 |
| <i>Alteromonadaceae</i>  | 3        | 2.15   | 7.58   | 4.86     | 87.37 |
| <i>Puniceicoccaceae</i>  | 1        | 2.15   | 7.58   | 4.86     | 92.24 |

\*Seawater group (W) includes water samples collected at 5m depth in May and June 2011 and in May 2010

**Groups A & W**

Average dissimilarity = 84,79

| Species                       | Group A  |          | Group W |         | Contrib% | Cum.% |
|-------------------------------|----------|----------|---------|---------|----------|-------|
|                               | Av.Abund | Av.Abund | Av.Diss | Diss/SD |          |       |
| <i>Flavobacteriaceae</i>      | 0        | 10       | 14.29   | 1.22    | 16.85    | 16.85 |
| <i>Rhodobacteraceae</i>       | 9.29     | 4.33     | 9.43    | 1.61    | 11.12    | 27.97 |
| <i>Synechococcus</i>          | 0.29     | 6.33     | 8.71    | 4.35    | 10.27    | 38.24 |
| SAR11                         | 0        | 5.33     | 6.97    | 1.41    | 8.21     | 46.46 |
| <i>Litoricolaceae</i>         | 0        | 3.33     | 4.91    | 1.63    | 5.79     | 52.24 |
| SAR116                        | 0        | 3.67     | 4.61    | 0.98    | 5.44     | 57.68 |
| <i>Burkholderiaceae</i>       | 3        | 0        | 3.78    | 0.61    | 4.46     | 62.14 |
| <i>Alteromonadaceae</i>       | 2        | 3        | 3.63    | 1.43    | 4.28     | 66.42 |
| <i>Vibrionaceae</i>           | 2.43     | 0        | 3.59    | 1.12    | 4.23     | 70.66 |
| <i>Microbacteriaceae</i>      | 0        | 2.33     | 3.53    | 1.5     | 4.16     | 74.82 |
| <i>Cryomorphaceae</i>         | 0        | 2        | 2.97    | 1.9     | 3.5      | 78.32 |
| <i>Pseudomonadaceae</i>       | 1.86     | 0        | 2.31    | 0.56    | 2.72     | 81.05 |
| <i>Pseudoalteromonadaceae</i> | 1.14     | 0        | 1.65    | 0.99    | 1.95     | 82.99 |
| <i>Chitinophagaceae</i>       | 0        | 1        | 1.52    | 1.06    | 1.79     | 84.78 |
| <i>Puniceicoccaceae</i>       | 0        | 1        | 1.46    | 5.99    | 1.72     | 86.5  |
| SAR86                         | 0        | 1        | 1.3     | 1.27    | 1.53     | 88.03 |
| OCS116                        | 0        | 1        | 1.2     | 0.69    | 1.42     | 89.45 |
