# Supplementary material for: Bacteria associated with moon jellyfish during bloom and post-bloom periods in the Gulf of Trieste (northern Adriatic)
Source: PubMed Central journal article supplement (PMC6333360; doi:10.1371/journal.pone.0198056), 2019-01-15
Supplement: pone.0198056.s005.pdf [file pone.0198056.s005.pdf]

**S5 Table. The diversity indices S, H', d, J', Chao- 1 and library coverage's (C) describing composition of total bacterial community associated with jellyfish exumbrella (AK), oral arms (AR) and mucus from gastral cavity (AG) and seawater (W) collected in May and June 2011 in the Gulf of Trieste. S represents the number of distinct bacterial taxa detected in each bacterial 16S rRNA gene clone library. C is a coverage value ( $C = (1-n_1/N)$ ), where  $n_1$  is number of phylotypes appearing only once in the library and N is the library size.**

|      | Sample | Species richness (S) | Shannon (H) | Margalef (d) | Equitability (J') | Chao-1 | Coverage value (C; %) | N  | $n_1$ |
|------|--------|----------------------|-------------|--------------|-------------------|--------|-----------------------|----|-------|
| May  | AK1    | 8                    | 1.49        | 2.30         | 0.72              | 11.33  | 0.76                  | 21 | 5     |
|      | AK2    | 8                    | 1.59        | 2.30         | 0.76              | 9.5    | 0.81                  | 21 | 4     |
|      | AR1    | 11                   | 2.03        | 2.86         | 0.85              | 12.5   | 0.88                  | 33 | 4     |
|      | AG1    | 8                    | 1.74        | 1.86         | 0.83              | 8.5    | 0.95                  | 43 | 2     |
|      | W_May  | 16                   | 1.95        | 3.43         | 0.70              | 17.67  | 0.94                  | 79 | 5     |
| June | AK6    | 7                    | 1.61        | 1.80         | 0.83              | 7      | 0.96                  | 28 | 1     |
|      | AK7    | 9                    | 1.86        | 2.25         | 0.85              | 10     | 0.91                  | 35 | 3     |
|      | AR6    | 13                   | 2.36        | 3.60         | 0.92              | 23.5   | 0.75                  | 28 | 7     |
|      | W_June | 23                   | 2.76        | 5.08         | 0.88              | 27.5   | 0.88                  | 76 | 9     |
