# Supplementary material for: Bacteria associated with moon jellyfish during bloom and post-bloom periods in the Gulf of Trieste (northern Adriatic)
Source: PubMed Central journal article supplement (PMC6333360; doi:10.1371/journal.pone.0198056), 2019-01-15
Supplement: pone.0198056.s006.pdf [file pone.0198056.s006.pdf]

**S6 Table. The diversity indices S, H', d, J' describing composition of culturable fraction of bacterial community associated with jellyfish exumbrella (AK) and mucus from gastral cavity (AG) and seawater (W) collected in May and June 2011 in the Gulf of Trieste. S represents the number of distinct bacterial taxa detected in each sample.**

|      | Sample | Species richness (S) | Shannon (H) | Margalef (d) | Equitability (J') |
|------|--------|----------------------|-------------|--------------|-------------------|
| May  | AK1    | 5                    | 1.36        | 1.74         | 0.84              |
|      | AK3    | 2                    | 0.67        | 0.39         | 0.96              |
|      | AK6    | 17                   | 2.33        | 3.82         | 0.82              |
|      | AG1    | 5                    | 1.56        | 2.23         | 0.97              |
|      | AG6    | 7                    | 1.85        | 2.50         | 0.95              |
|      | W_May  | 12                   | 1.89        | 2.80         | 0.76              |
| June | AK8    | 4                    | 0.98        | 1.21         | 0.71              |
|      | AK10   | 1                    | 0           | 0            | 0                 |
|      | AK11   | 2                    | 0.38        | 0.48         | 0.54              |
|      | AG8    | 4                    | 1.39        | 2.16         | 1.00              |
|      | AG11   | 1                    | 0           | 0            | 0                 |
|      | W_June | 18                   | 2           | 4            | 0.8504            |
