# Supplementary material for: Bacteria associated with moon jellyfish during bloom and post-bloom periods in the Gulf of Trieste (northern Adriatic)
Source: PubMed Central journal article supplement (PMC6333360; doi:10.1371/journal.pone.0198056), 2019-01-15
Supplement: pone.0198056.s007.pdf [file pone.0198056.s007.pdf]

**S7 Table. Bacterial 16S rRNA sequences obtained from DGGE bands from jellyfish samples with their accession numbers.** In the table there is also the name and an accession number of their closest relative in GeneBank (NCBI) with % of similarity, family, taxon and isolation source.

| DGGE Band      | Acc. No. | Class                      | Family                        | Genus                    | Closest relative in GeneBank; Acc. No.                                                                         | Similarity [%] | Isolation source                             |
|----------------|----------|----------------------------|-------------------------------|--------------------------|----------------------------------------------------------------------------------------------------------------|----------------|----------------------------------------------|
| BAND_A02_AK2_1 | MF952749 | <i>Alphaproteobacteria</i> | <i>Rhodobacteraceae</i>       | <i>Ruegeria</i>          | <i>Ruegeria</i> sp. S11AQ 16S ribosomal RNA gene, partial sequence; KF188478                                   | 100            | Host: sponge <i>Asbestopluma hypogea</i>     |
| BAND_A03_AK6_1 | MF952750 | <i>Deinococci</i>          | <i>Trueperaceae</i>           | <i>Truepera</i>          | Uncultured bacterium clone THERM1 16S ribosomal RNA gene, partial sequence; AY494700                           | 98             | Salmo salar gill                             |
| BAND_A04_AR1_1 | MF952751 | <i>Gammaproteobacteria</i> | <i>Vibrionaceae</i>           | <i>Vibrio</i>            | Uncultured bacterium clone SanDiego_a2803 16S ribosomal RNA gene, partial sequence; KF799588                   | 97             | Ocean water                                  |
| BAND_B01_AK1_1 | MF952752 | <i>Alphaproteobacteria</i> | <i>Rhodobacteraceae</i>       | <i>Roseobacter</i>       | <i>Roseobacter</i> sp. Z7 16S ribosomal RNA gene, partial sequence; KT461667                                   | 98             | Host: brown alga <i>Ectocarpus</i> sp.       |
| BAND_B04_AR6_1 | MF952753 | <i>Betaproteobacteria</i>  | <i>Burkholderiaceae</i>       | <i>Burkholderia</i>      | Uncultured Burkholderia sp. gene for 16S ribosomal RNA, partial sequence clone: LR564B-55; LC001458            | 98             | Lake                                         |
| BAND_C02_AK2_2 | MF952754 | <i>Actinobacteria</i>      | <i>Coriobacteriaceae</i>      | <i>Atopobium</i>         | Uncultured bacterium clone ncd1381f1c1 16S ribosomal RNA gene, partial sequence; JF120828                      | 97             | Skin, popliteal fossa                        |
| BAND_C03_AK7_1 | MF952755 | <i>Gammaproteobacteria</i> | <i>Vibrionaceae</i>           | <i>Vibrio</i>            | <i>Vibrio</i> cyclitrophicus strain Mj149 16S ribosomal RNA gene, partial sequence; GQ454943                   | 99             | Hemolymph of spider crab                     |
| BAND_D03_AK7_2 | MF952756 | <i>Betaproteobacteria</i>  | <i>Comamonadaceae</i>         | <i>Pelomonas</i>         | Uncultured beta proteobacterium gene for 16S rRNA, partial sequence, isolate: DGGE band: OBmeso04-51; AB367341 | 99             | Coastal seawater                             |
| BAND_D04_AR6_2 | MF952757 | <i>Gammaproteobacteria</i> | <i>Pseudoalteromonadaceae</i> | <i>Pseudoalteromonas</i> | Uncultured Pseudoalteromonas sp. clone JL-BS-K65 16S ribosomal RNA gene, partial sequence; AY664354            | 99             | Sea water                                    |
| BAND_E01_AK1_2 | MF952758 | <i>Alphaproteobacteria</i> | <i>Rhodobacteraceae</i>       |                          | Uncultured bacterium clone H9pH79a 16S ribosomal RNA gene, partial sequence; JQ179029                          | 98             | Host: crustose coralline algae               |
| BAND_E03_AK7_3 | MF952759 | <i>Actinobacteria</i>      | <i>Microbacteriaceae</i>      | <i>Leucobacter</i>       | <i>Leucobacter</i> sp. C7.oil.3 16S ribosomal RNA gene, partial sequence; KJ756157                             | 97             | Gulf of Mexico sediment                      |
| BAND_E04_AR6_3 | MF952760 | <i>Gammaproteobacteria</i> | <i>Xanthomonadaceae</i>       | <i>Stenotrophomonas</i>  | Uncultured bacterium clone DoIGs_A056 16S ribosomal RNA gene, partial sequence; JQ194688                       | 97             | Deep-sea sediments                           |
| BAND_F01_AK1_3 | MF952761 | <i>Alphaproteobacteria</i> | <i>Rhodobacteraceae</i>       | <i>Phaeobacter</i>       | <i>Phaeobacter</i> sp. PP_B2A.4 16S ribosomal RNA gene, partial sequence; KC250896                             | 99             | Host: diatom <i>Pseudo-nitzschia pungens</i> |
| BAND_G04_AG1_1 | MF952762 | <i>Gammaproteobacteria</i> | <i>Xanthomonadaceae</i>       | <i>Stenotrophomonas</i>  | <i>Stenotrophomonas</i> maltophilia strain KW 98 16S ribosomal RNA gene, partial sequence; JX262398            | 97             | Arctic ocean sediment and water              |
| BAND_H01_AK1_4 | MF952763 | <i>Gammaproteobacteria</i> | <i>Xanthomonadaceae</i>       | <i>Stenotrophomonas</i>  | <i>Stenotrophomonas</i> maltophilia strain ISMMS2, complete genome; CP011305                                   | 98             | Complete genome                              |
