# Supplementary material for: Bacteria associated with moon jellyfish during bloom and post-bloom periods in the Gulf of Trieste (northern Adriatic)
Source: PubMed Central journal article supplement (PMC6333360; doi:10.1371/journal.pone.0198056), 2019-01-15
Supplement: pone.0198056.s011.pdf [file pone.0198056.s011.pdf]

## **S2 Protocol. PCR reaction mix composition and PCR temperature cycling conditions.**

### **A**

- ***Amplification of bacterial 16S rRNA genes extracted from bacterial isolates***

Bacterial 16S rRNA genes were amplified using universal bacterial primers 27F and 1492R (Lane, 1991). The PCR reaction mix (50 µl) contained 2 µl (50-100 ng) of extracted genomic DNA, 1x reaction buffer (TrisKCl-MgCl<sub>2</sub>), 2 mM MgCl<sub>2</sub>, 0.2 mM dNTP, 1 µM of each primer, and Taq polymerase (5U/µl, Fermentas).

The PCR temperature cycling conditions were as follows: initial denaturation at 94°C for 2 min; 30 cycles of denaturation at 94°C for 1 min, annealing at 55°C for 2 min, and elongation at 72°C for 2 min. The final cycle was followed by extension at 72°C for 5 min.

### **B**

- ***Amplification of bacterial 16S rRNA genes of total bacterial community for Denaturing Gradient Gel Electrophoresis***

#### *Standard PCR- DGGE strategy*

For DGGE analysis of jellyfish-associated and seawater's total bacterial community, the bacterial 16S rRNA genes were amplified using a universal primer set, 341F with a 40 bp GC-clamp and 907R as described before (Muyzer et al., 1993; Muyzer and Smalla, 1998).

The PCR reaction mix with a final volume 50 µl contained 2 µl of extracted DNA (50–100 ng), 1x reaction buffer (Tris KCl-MgCl<sub>2</sub>, Fermentas), 1.5 mM MgCl<sub>2</sub> (Fermentas), 0.2 mM dNTP (Fermentas), 0.5 µM of each primer (Sigma), 0.38 µg/ml BSA (Fermentas), and Taq polymerase (5 U/µl, Fermentas).

The PCR touchdown protocol according to Don *et al.* (Don et al., 1991) was used: with initial denaturation at 94°C for 5 min, followed by 10 touchdown cycles (1°C decrease of annealing

temperature every cycle) and 20 standard cycles: denaturation for 1 min at 94°C, primer annealing for 1 min at 55°C, and primer extension for 3 min at 72°C. The last cycle was followed by 5 min incubation at primer extension temperature of 72°C.

#### *Nested PCR-DGGE strategy*

- First step: Bacterial 16S rRNA genes were first amplified with universal primer set, 27F and 1492R. The PCR reaction mix with a final volume 50 µl contained 2 µl of extracted DNA (50–100 ng), 1x reaction buffer (Tris KCl-MgCl<sub>2</sub>, Fermentas), 1.5 mM MgCl<sub>2</sub> (Fermentas), 0.2 mM dNTP (Fermentas), 0.5 µM of each primer (Sigma), 0.38 µg/ml BSA (Fermentas), and Taq polymerase (5 U/µl, Fermentas).

The PCR temperature cycling conditions were as follows: initial denaturation for 5 min at 95°C, followed by 25 standard cycles: denaturation at 95°C for 1 min, primer annealing for 1 min at 50°C, and primer extension at 72°C for 2 min. The last cycle was followed by 5 min incubation at the primer extension temperature of 72°C.

- Second step: nested amplification was performed using a DGGE primer set, PCR mixture, and a touchdown annealing protocol, as described above in this section (Standard PCR-DGGE strategy).

## **C**

- ***Amplification of bacterial 16S rRNA genes from excised bands from DGGE gel***

The eluted DNA was re-amplified using primer set 341F and 907R. The PCR reaction mix with a final volume 50 µl contained 2 µl of extracted DNA, 1x reaction buffer (Tris KCl-MgCl<sub>2</sub>, Fermentas), 1.5 mM MgCl<sub>2</sub> (Fermentas), 0.2 mM dNTP (Fermentas), 0.5 µM of each primer (Sigma), 0.38 µg/ml BSA (Fermentas), and Taq polymerase (5 U/µl, Fermentas).

The cycling protocol used was as follows: initial denaturation at 94°C for 2 min; 30 cycles of denaturation at 94°C for 1 min, annealing at 55°C for 2 min, and elongation at 72°C for 2 min. The final cycle was followed by extension at 72°C for 5 min.

## D

- ***Amplification of bacterial 16S rRNA gene for clone library construction***

### *Standard PCR- clone library approach*

For clone library construction, bacterial 16S rRNA genes were amplified using the same DNA as for DGGE and universal primer set, 27F and 1492R. The PCR reaction mix with a final volume 50 µl contained 2 µl of extracted DNA, 1x reaction buffer (Tris KCl-MgCl<sub>2</sub>, Fermentas), 1.5 mM MgCl<sub>2</sub> (Fermentas), 0.2 mM dNTP (Fermentas), 0.5 µM of each primer (Sigma), 0.38 µg/ml BSA (Fermentas), and Taq polymerase (5 U/µl, Fermentas).

The cycling protocol used was as follows: initial denaturation at 95°C for 2 min; 30 cycles of denaturation at 95°C for 30 s, annealing at 50°C for 30 s, and elongation at 72°C for 2 min. The final cycle was followed by extension at 72°C for 7 min.

### *Nested PCR- Clone library approach (Giloteaux et al., 2010) with modifications*

First step: bacterial 16S rRNA gene was first amplified with a universal primer set, 27F and 1492R, using same protocol and reaction mix as in the first amplification step of the nested PCR-DGGE strategy.

Second step: nested amplification was performed using primers 341F and 907R. The PCR reaction mixture and cycling protocol were the same as used for standard clone library approach.
